# Supplementary material for: Plasmodium berghei-Released Factor, PbTIP, Modulates the Host Innate Immune Responses
Source: Front Immunol. 2021 Dec 7;12:699887. doi: 10.3389/fimmu.2021.699887 (PMC8721568; doi:10.3389/fimmu.2021.699887)
Supplement: Supplementary Material — Gene ontology (GO) analysis. Gene ontology (GO) analyses revealed that following cellular components were enriched; Plasma membrane (GO:0005886), Cytoplasm (GO:0005737), nucleus (GO:0005634) and integral components of membrane (GO:0016021). Similarly enriched molecular components include, identical protein binding (GO:0042802), ATP binding (GO:0005524), signalling receptor binding (GO:0005102) Calcium ion binding (GO:0005509) and Zinc ion binding (GO:0008270). The biological processes that were majorly affected included cell surface receptor signalling (GO:0007166), cAMP biosynthetic process (GO:0006171), negative regulation of angiogenesis (GO:0016525), intracellular signal transduction (GO:0035556) and cellular response to LPS(GO:0071222). Detailed analysis further revealed that up-regulated genes inhibit immune response; by negative regulation of i) antigen processing and presentation of endogenous peptide antigen via MHC class I via ER pathway, TAP-independent [GO:0002486], ii) CD4+ alpha-beta T cell proliferation [GO:2000562], iii) CD8+ alpha-beta T cell proliferation [GO:2000565], iv) IFN-gamma production [GO:0032689], v) IL-17 production [GO:0032700], vi) TNF production [GO:0032720], and by positive regulation of i) I-kappaB kinase/NF-kappaB signaling [GO:0043123], ii) IL-10 production [GO:0032733] iii) isotype switching [GO:0045830] iv) regulatory T cell differentiation [GO:0045591], v) protein ubiquitination [GO:0031398] vi) TGF beta receptor signaling pathway [GO:0007179] Upregulated genes are also involved in immune checkpoint blockade pathways as evident by enrichment of GO terms i) negative regulation of cell population proliferation [GO:0008285] ii) intracellular signal transduction [GO:0035556], iii) immune response-regulating cell surface receptor signalling pathway [GO:0002768] iv) extrathymic T cell selection [GO:0045062] and v) cell population proliferation [GO:0008283] [file DataSheet_1.xlsx]

## Sheet: Pathways count
Row Labels	Count of Pathway
PATHWAY: Protein modification	33
PATHWAY: Lipid metabolism	12
PATHWAY:protein ubiquitination.	11
PATHWAY:protein glycosylation.	10
PATHWAY: Cofactor biosynthesis	8
PATHWAY: Carbohydrate degradation	7
PATHWAY:glycolysis	6
PATHWAY: Amino-acid biosynthesis	5
PATHWAY: Porphyrin-containing compound metabolism	4
PATHWAY:L-methionine biosynthesis via salvagePATHWAY:	4
PATHWAY: Amine and polyamine biosynthesis	3
PATHWAY: Nitrogen metabolism	3
PATHWAY:protein ubiquitination. {ECO:0000256|SAAS:SAAS00966769}.	3
PATHWAY:protoporphyrin-IX biosynthesis	3
PATHWAY:pyruvate from D-glyceraldehyde 3-phosphate: step 1/5. {ECO:0000256|RuleBase:RU361160}.	3
PATHWAY:UMP biosynthesis via de novoPATHWAY:	3
PATHWAY:urea cycle	3
PATHWAY: Amino-acid degradation	2
PATHWAY: Glycan metabolism	2
PATHWAY: Steroid biosynthesis	2
PATHWAY:5-aminolevulinate from glycine: step 1/1. {ECO:0000256|RuleBase:RU910713}.	2
PATHWAY:AMP biosynthesis via de novoPATHWAY:	2
PATHWAY:CDP-diacylglycerol biosynthesis	2
PATHWAY:coenzyme A biosynthesis	2
PATHWAY: Alcohol metabolism	1
PATHWAY: Catecholamine biosynthesis	1
PATHWAY: Cofactor metabolism	1
PATHWAY: fatty acid metabolism. {ECO:0000250|UniProtKB:P07871}.	1
PATHWAY: Glycerolipid metabolism	1
PATHWAY: mitochondrial fatty acid beta-oxidation. {ECO:0000250|UniProtKB:P16219}.	1
PATHWAY: Organosulfur biosynthesis	1
PATHWAY: protein glycosylation. {ECO:0000250|UniProtKB:P16442}.	1
PATHWAY: protein glycosylation. {ECO:0000269|PubMed:22307328}.	1
PATHWAY: Sulfur metabolism	1
PATHWAY: tRNA modification	1

## Sheet: List of pathways 
GENE	Pathway
A4gnt	PATHWAY: Protein modification
A4gnt	PATHWAY: protein glycosylation. {ECO:0000269|PubMed:22307328}.
Abo	PATHWAY: Protein modification
Abo	PATHWAY: protein glycosylation. {ECO:0000250|UniProtKB:P16442}.
Acaa1b	PATHWAY: Lipid metabolism
Acaa1b	PATHWAY: fatty acid metabolism. {ECO:0000250|UniProtKB:P07871}.
Acads	PATHWAY: Lipid metabolism
Acads	PATHWAY: mitochondrial fatty acid beta-oxidation. {ECO:0000250|UniProtKB:P16219}.
Acer1	PATHWAY: Lipid metabolism
Acer1	PATHWAY:sphingolipid metabolism. {ECO:0000269|PubMed:12783875, ECO:0000269|PubMed:27126290}.
Acer2	PATHWAY: Lipid metabolism
Acer2	PATHWAY:sphingolipid metabolism. {ECO:0000269|PubMed:29401619}.
Adi1	PATHWAY: Amino-acid biosynthesis
Adi1	PATHWAY:L-methionine biosynthesis via salvagePATHWAY:
Adi1	PATHWAY:L-methionine from S-methyl-5-thio-alpha-D-ribose 1-phosphate: step 5/6. {ECO:0000255|HAMAP-Rule:MF_03154}.
Adss	PATHWAY: Purine metabolism
Adss	PATHWAY:AMP biosynthesis via de novoPATHWAY:
Adss	PATHWAY:AMP from IMP: step 1/2. {ECO:0000256|HAMAP-Rule:MF_03127, ECO:0000256|RuleBase:RU000520}.
Adssl1	PATHWAY: Purine metabolism
Adssl1	PATHWAY:AMP biosynthesis via de novoPATHWAY:
Adssl1	PATHWAY:AMP from IMP: step 1/2. {ECO:0000256|HAMAP-Rule:MF_03126, ECO:0000256|RuleBase:RU000520}.
Agps	PATHWAY: Glycerolipid metabolism
Agps	PATHWAY:ether lipid biosynthesis. {ECO:0000256|RuleBase:RU363113}.
Alas1	PATHWAY: Porphyrin-containing compound metabolism
Alas1	PATHWAY:protoporphyrin-IX biosynthesis
Alas1	PATHWAY:5-aminolevulinate from glycine: step 1/1. {ECO:0000256|RuleBase:RU910713}.
Alas2	PATHWAY: Porphyrin-containing compound metabolism
Alas2	PATHWAY:protoporphyrin-IX biosynthesis
Alas2	PATHWAY:5-aminolevulinate from glycine: step 1/1. {ECO:0000256|RuleBase:RU910713}.
Aldh1a2	PATHWAY: Cofactor metabolism
Aldh1a2	PATHWAY:retinol metabolism. {ECO:0000269|PubMed:8797830}.
Aldh3b2	PATHWAY: Alcohol metabolism
Aldh3b2	PATHWAY:ethanol degradation
Aldh3b2	PATHWAY:acetate from ethanol: step 2/2. {ECO:0000250|UniProtKB:P48448}.
Aldh5a1	PATHWAY: Amino-acid degradation
Aldh5a1	PATHWAY:4-aminobutanoate degradation. {ECO:0000256|RuleBase:RU365091}.
Aldoart1	PATHWAY: Carbohydrate degradation
Aldoart1	PATHWAY:glycolysis
Aldoart1	PATHWAY:D-glyceraldehyde 3-phosphate and glycerone phosphate from D-glucose: step 4/4. {ECO:0000256|RuleBase:RU004257, ECO:0000256|SAAS:SAAS00312563}.
Aldoart2	PATHWAY: Carbohydrate degradation
Aldoart2	PATHWAY:glycolysis
Aldoart2	PATHWAY:D-glyceraldehyde 3-phosphate and glycerone phosphate from D-glucose: step 4/4. {ECO:0000256|RuleBase:RU004257, ECO:0000256|SAAS:SAAS00312563}.
Aldoc	PATHWAY: Carbohydrate degradation
Aldoc	PATHWAY:glycolysis
Aldoc	PATHWAY:D-glyceraldehyde 3-phosphate and glycerone phosphate from D-glucose: step 4/4.
Alg1	PATHWAY: Protein modification
Alg1	PATHWAY:protein glycosylation.
Alg3	PATHWAY: Protein modification
Alg3	PATHWAY:protein glycosylation. {ECO:0000256|RuleBase:RU364047}.
Alg6	PATHWAY: Protein modification
Alg6	PATHWAY:protein glycosylation. {ECO:0000256|RuleBase:RU363110}.
Alg8	PATHWAY: Protein modification
Alg8	PATHWAY:protein glycosylation. {ECO:0000256|RuleBase:RU363110}.
Alox12b	PATHWAY: Lipid metabolism
Alox12b	PATHWAY:hydroperoxy eicosatetraenoic acid biosynthesis.
Alox12b	PATHWAY: Lipid metabolism
Alox12b	PATHWAY:sphingolipid metabolism.
Alox12e	PATHWAY: Lipid metabolism
Alox12e	PATHWAY:hydroperoxy eicosatetraenoic acid biosynthesis.
Amacr	PATHWAY: Lipid metabolism
Amacr	PATHWAY:bile acid biosynthesis.
Amacr	PATHWAY: Lipid metabolism
Amacr	PATHWAY:fatty acid metabolism.
Amd2	PATHWAY: Amine and polyamine biosynthesis
Amd2	PATHWAY:S-adenosylmethioninamine biosynthesis
Amd2	PATHWAY:S-adenosylmethioninamine from S-adenosyl-L-methionine: step 1/1.
Amdhd1	PATHWAY: Amino-acid degradation
Amdhd1	PATHWAY:L-histidine degradation into L-glutamate
Amdhd1	PATHWAY:N-formimidoyl-L-glutamate from L-histidine: step 3/3.
Anapc11	PATHWAY: Protein modification
Anapc11	PATHWAY:protein ubiquitination.
Anapc13	PATHWAY: Protein modification
Anapc13	PATHWAY:protein ubiquitination.
Anapc16	PATHWAY: Protein modification
Anapc16	PATHWAY:protein ubiquitination.
Apip	PATHWAY: Amino-acid biosynthesis
Apip	PATHWAY:L-methionine biosynthesis via salvagePATHWAY:
Apip	PATHWAY:L-methionine from S-methyl-5-thio-alpha-D-ribose 1-phosphate: step 2/6. {ECO:0000255|HAMAP-Rule:MF_03116}.
Arg1	PATHWAY: Nitrogen metabolism
Arg1	PATHWAY:urea cycle
Arg1	PATHWAY:L-ornithine and urea from L-arginine: step 1/1. {ECO:0000250|UniProtKB:P05089}.
Arg2	PATHWAY: Nitrogen metabolism
Arg2	PATHWAY:urea cycle
Arg2	PATHWAY:L-ornithine and urea from L-arginine: step 1/1. {ECO:0000250|UniProtKB:P05089}.
Asb13	PATHWAY: Protein modification
Asb13	PATHWAY:protein ubiquitination.
Asb2	PATHWAY: Protein modification
Asb2	PATHWAY:protein ubiquitination.
Asb3	PATHWAY: Protein modification
Asb3	PATHWAY:protein ubiquitination. {ECO:0000256|SAAS:SAAS00966769}.
Asb7	PATHWAY: Protein modification
Asb7	PATHWAY:protein ubiquitination. {ECO:0000256|SAAS:SAAS00966769}.
Asb8	PATHWAY: Protein modification
Asb8	PATHWAY:protein ubiquitination. {ECO:0000256|SAAS:SAAS00966769}.
Asb9	PATHWAY: Protein modification
Asb9	PATHWAY:protein ubiquitination.
Ass1	PATHWAY: Amino-acid biosynthesis
Ass1	PATHWAY:L-arginine biosynthesis
Ass1	PATHWAY:L-arginine from L-ornithine and carbamoyl phosphate: step 2/3. {ECO:0000250|UniProtKB:P00966}.
Ass1	PATHWAY: Nitrogen metabolism
Ass1	PATHWAY:urea cycle
Ass1	PATHWAY:(N(omega)-L-arginino)succinate from L-aspartate and L-citrulline: step 1/1. {ECO:0000250|UniProtKB:P00966}.
B3galnt1	PATHWAY: Protein modification
B3galnt1	PATHWAY:protein glycosylation.
B3galt5	PATHWAY: Protein modification
B3galt5	PATHWAY:protein glycosylation.
B3galt6	PATHWAY: Glycan metabolism
B3galt6	PATHWAY:chondroitin sulfate biosynthesis.
B3galt6	PATHWAY: Glycan metabolism
B3galt6	PATHWAY:heparan sulfate biosynthesis.
B3gat1	PATHWAY: Protein modification
B3gat1	PATHWAY:protein glycosylation. {ECO:0000256|RuleBase:RU363127}.
B3gat2	PATHWAY: Protein modification
B3gat2	PATHWAY:protein glycosylation. {ECO:0000256|RuleBase:RU363127}.
B3glct	PATHWAY: Protein modification
B3glct	PATHWAY:protein glycosylation.
B3gnt4	PATHWAY: Protein modification
B3gnt4	PATHWAY:protein glycosylation.
B3gnt5	PATHWAY: Protein modification
B3gnt5	PATHWAY:protein glycosylation.
B3gnt6	PATHWAY: Protein modification
B3gnt6	PATHWAY:protein glycosylation.
Bard1	PATHWAY: Protein modification
Bard1	PATHWAY:protein ubiquitination.
Btbd1	PATHWAY: Protein modification
Btbd1	PATHWAY:protein ubiquitination.
C1galt1	PATHWAY: Protein modification
C1galt1	PATHWAY:protein glycosylation.
Cad	PATHWAY: Pyrimidine metabolism
Cad	PATHWAY:UMP biosynthesis via de novoPATHWAY:
Cad	PATHWAY:(S)-dihydroorotate from bicarbonate: step 1/3.
Cad	PATHWAY:Pyrimidine metabolism
Cad	PATHWAY:UMP biosynthesis via de novoPATHWAY:
Cad	PATHWAY:(S)-dihydroorotate from bicarbonate: step 2/3.
Cad	PATHWAY: Pyrimidine metabolism
Cad	PATHWAY:UMP biosynthesis via de novoPATHWAY:
Cad	PATHWAY:(S)-dihydroorotate from bicarbonate: step 3/3.
Cbx4	PATHWAY: Protein modification
Cbx4	PATHWAY:protein sumoylation.
Cdc20	PATHWAY: Protein modification
Cdc20	PATHWAY:protein ubiquitination.
Cdc27	PATHWAY: Protein modification
Cdc27	PATHWAY:protein ubiquitination.
Cdo1	PATHWAY: Organosulfur biosynthesis
Cdo1	PATHWAY:taurine biosynthesis
Cdo1	PATHWAY:hypotaurine from L-cysteine: step 1/2. {ECO:0000256|RuleBase:RU366010}.
Cds1	PATHWAY: Phospholipid metabolism
Cds1	PATHWAY:CDP-diacylglycerol biosynthesis
Cds1	PATHWAY:CDP-diacylglycerol from sn-glycerol 3-phosphate: step 3/3.
Cds2	PATHWAY: Phospholipid metabolism
Cds2	PATHWAY:CDP-diacylglycerol biosynthesis
Cds2	PATHWAY:CDP-diacylglycerol from sn-glycerol 3-phosphate: step 3/3. {ECO:0000256|PIRNR:PIRNR018269, ECO:0000256|RuleBase:RU003938}.
Cers3	PATHWAY: Lipid metabolism
Cers3	PATHWAY:sphingolipid metabolism. {ECO:0000269|PubMed:16753040, ECO:0000269|PubMed:18541923, ECO:0000269|PubMed:22038835}.
Coasy	PATHWAY: Cofactor biosynthesis
Coasy	PATHWAY:coenzyme A biosynthesis
Coasy	PATHWAY:CoA from (R)-pantothenate: step 4/5.
Coasy	PATHWAY: Cofactor biosynthesis
Coasy	PATHWAY:coenzyme A biosynthesis
Coasy	PATHWAY:CoA from (R)-pantothenate: step 5/5. {ECO:0000250|UniProtKB:Q13057}.
Coq3	PATHWAY: Cofactor biosynthesis
Coq3	PATHWAY:ubiquinone biosynthesis. {ECO:0000256|HAMAP-Rule:MF_03190}.
Coq4	PATHWAY: Cofactor biosynthesis
Coq4	PATHWAY:ubiquinone biosynthesis. {ECO:0000256|SAAS:SAAS00891253}.
Coq6	PATHWAY: Cofactor biosynthesis
Coq6	PATHWAY:ubiquinone biosynthesis. {ECO:0000256|HAMAP-Rule:MF_03193}.
Coq7	PATHWAY: Cofactor biosynthesis
Coq7	PATHWAY:ubiquinone biosynthesis. {ECO:0000256|HAMAP-Rule:MF_03194}.
Cpox	PATHWAY: Porphyrin-containing compound metabolism
Cpox	PATHWAY:protoporphyrin-IX biosynthesis
Cpox	PATHWAY:protoporphyrinogen-IX from coproporphyrinogen-III (O2 route): step 1/1.
Ctps	PATHWAY: Pyrimidine metabolism
Ctps	PATHWAY:CTP biosynthesis via de novoPATHWAY:
Ctps	PATHWAY:CTP from UDP: step 2/2. {ECO:0000250|UniProtKB:P17812}.
Ctu1	PATHWAY: tRNA modification
Ctu1	PATHWAY:5-methoxycarbonylmethyl-2-thiouridine-tRNA biosynthesis. {ECO:0000255|HAMAP-Rule:MF_03053}.
Cul4b	PATHWAY: Protein modification
Cul4b	PATHWAY:protein ubiquitination. {ECO:0000250|UniProtKB:Q13620}.
Cyp11a1	PATHWAY: Lipid metabolism
Cyp11a1	PATHWAY:C21-steroid hormone metabolism. {ECO:0000256|RuleBase:RU364077}.
Cyp51	PATHWAY: Steroid biosynthesis
Cyp51	PATHWAY:zymosterol biosynthesis
Cyp51	PATHWAY:zymosterol from lanosterol: step 1/6.
Cyp7a1	PATHWAY: Lipid metabolism
Cyp7a1	PATHWAY:bile acid biosynthesis. {ECO:0000256|PIRNR:PIRNR000047}.
Dad1	PATHWAY: Protein modification
Dad1	PATHWAY:protein glycosylation.
Dbh	PATHWAY: Catecholamine biosynthesis
Dbh	PATHWAY:(R)-noradrenaline biosynthesis
Dbh	PATHWAY:(R)-noradrenaline from dopamine: step 1/1. {ECO:0000269|PubMed:27148966, ECO:0000269|PubMed:7715704}.
Dcaf10	PATHWAY: Protein modification
Dcaf10	PATHWAY:protein ubiquitination.
Dhcr24	PATHWAY: Steroid biosynthesis
Dhcr24	PATHWAY:cholesterol biosynthesis. {ECO:0000269|PubMed:26114596}.
Dhfr	PATHWAY: Cofactor biosynthesis
Dhfr	PATHWAY:tetrahydrofolate biosynthesis
Dhfr	PATHWAY:5,6,7,8-tetrahydrofolate from 7,8-dihydrofolate: step 1/1.
Enoph1	PATHWAY: Amino-acid biosynthesis
Enoph1	PATHWAY:L-methionine biosynthesis via salvagePATHWAY:
Enoph1	PATHWAY:L-methionine from S-methyl-5-thio-alpha-D-ribose 1-phosphate: step 3/6. {ECO:0000255|HAMAP-Rule:MF_03117}.
Enoph1	PATHWAY: Amino-acid biosynthesis
Enoph1	PATHWAY:L-methionine biosynthesis via salvagePATHWAY:
Enoph1	PATHWAY:L-methionine from S-methyl-5-thio-alpha-D-ribose 1-phosphate: step 4/6. {ECO:0000255|HAMAP-Rule:MF_03117}.
Etnk2	PATHWAY: Phospholipid metabolism
Etnk2	PATHWAY:phosphatidylethanolamine biosynthesis
Etnk2	PATHWAY:phosphatidylethanolamine from ethanolamine: step 1/3.
Fech	PATHWAY: Porphyrin-containing compound metabolism
Fech	PATHWAY:protoheme biosynthesis
Fech	PATHWAY:protoheme from protoporphyrin-IX: step 1/1. {ECO:0000256|RuleBase:RU000607}.
G6pd2	PATHWAY: Carbohydrate degradation
G6pd2	PATHWAY:pentose phosphatePATHWAY:
G6pd2	PATHWAY:D-ribulose 5-phosphate from D-glucose 6-phosphate (oxidative stage): step 1/3. {ECO:0000256|RuleBase:RU362120}.
Gamt	PATHWAY: Amine and polyamine biosynthesis
Gamt	PATHWAY:creatine biosynthesis
Gamt	PATHWAY:creatine from L-arginine and glycine: step 2/2.
Gapdh	PATHWAY: Carbohydrate degradation
Gapdh	PATHWAY:glycolysis
Gapdh	PATHWAY:pyruvate from D-glyceraldehyde 3-phosphate: step 1/5. {ECO:0000256|RuleBase:RU361160}.
Gapdhs	PATHWAY: Carbohydrate degradation
Gapdhs	PATHWAY:glycolysis
Gapdhs	PATHWAY:pyruvate from D-glyceraldehyde 3-phosphate: step 1/5. {ECO:0000256|RuleBase:RU361160}.
Gatm	PATHWAY: Amine and polyamine biosynthesis
Gatm	PATHWAY:creatine biosynthesis
Gatm	PATHWAY:creatine from L-arginine and glycine: step 1/2.
Gch1	PATHWAY: Cofactor biosynthesis
Gch1	PATHWAY:7,8-dihydroneopterin triphosphate biosynthesis
Gch1	PATHWAY:7,8-dihydroneopterin triphosphate from GTP: step 1/1. {ECO:0000250|UniProtKB:P30793}.
Gclc	PATHWAY: Sulfur metabolism
Gclc	PATHWAY:glutathione biosynthesis
Gclc	PATHWAY:glutathione from L-cysteine and L-glutamate: step 1/2.
Gcnt1	PATHWAY: Protein modification
Gcnt1	PATHWAY:protein glycosylation.
Gda	PATHWAY: Purine metabolism
Gda	PATHWAY:guanine degradation
Gda	PATHWAY:xanthine from guanine: step 1/1. {ECO:0000256|RuleBase:RU366009}.
Gm10358	PATHWAY: Carbohydrate degradation
Gm10358	PATHWAY:glycolysis
Gm10358	PATHWAY:pyruvate from D-glyceraldehyde 3-phosphate: step 1/5. {ECO:0000256|RuleBase:RU361160}.
